# Supplementary figures and images for: A new method for evaluating the most stable contact angle using tilting plate experiments
Source: Royal Society of Chemistry journal article supplement (doi:10.1039/c1sm06196h), 2011-01-01

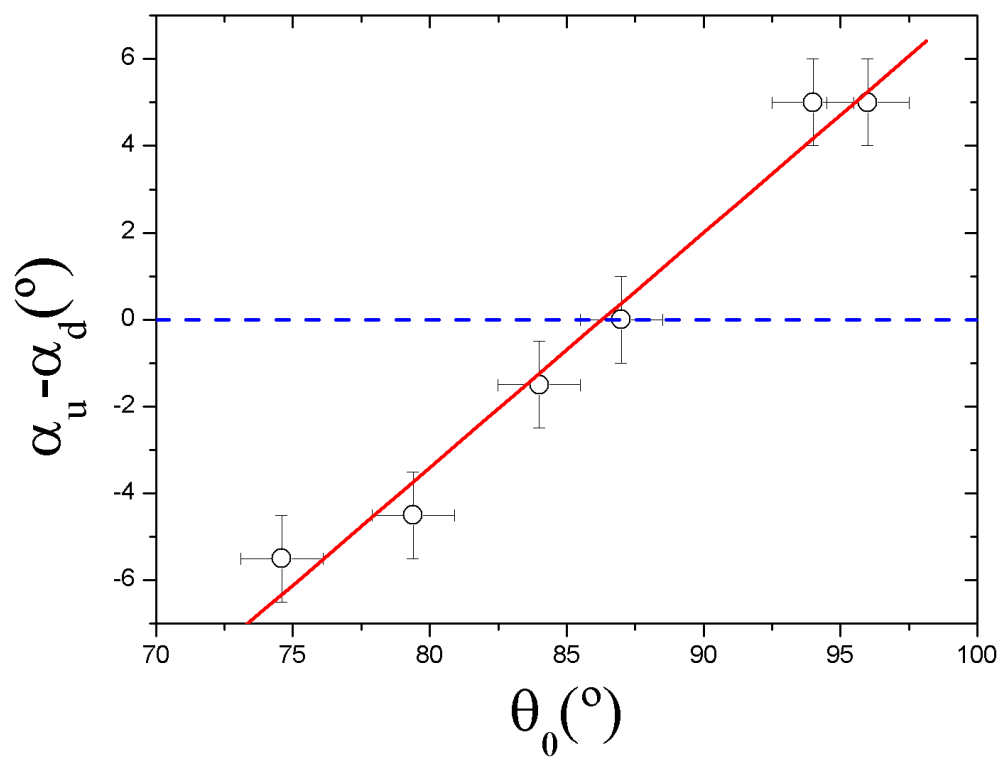

Figure S1

Supplement: c1sm06196h.pdf [file c1sm06196h.pdf]
